# Supplementary material for: New Cd2+, Pb2+ complexes with acylhydrazidate molecules from in situ acylation reactions
Source: Royal Society of Chemistry journal article supplement (doi:10.1039/c3dt50411e), 2013-01-01
Supplement: c3dt50411e.pdf [file c3dt50411e.pdf]

# Supporting Materials

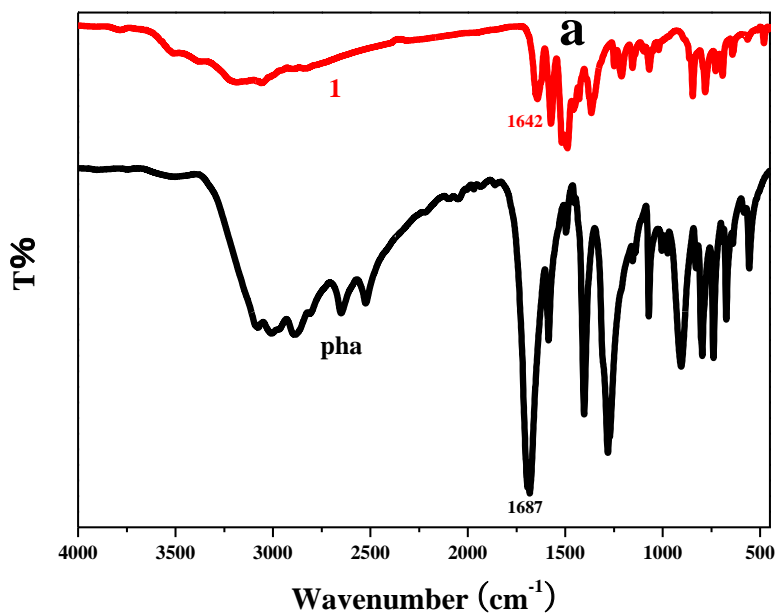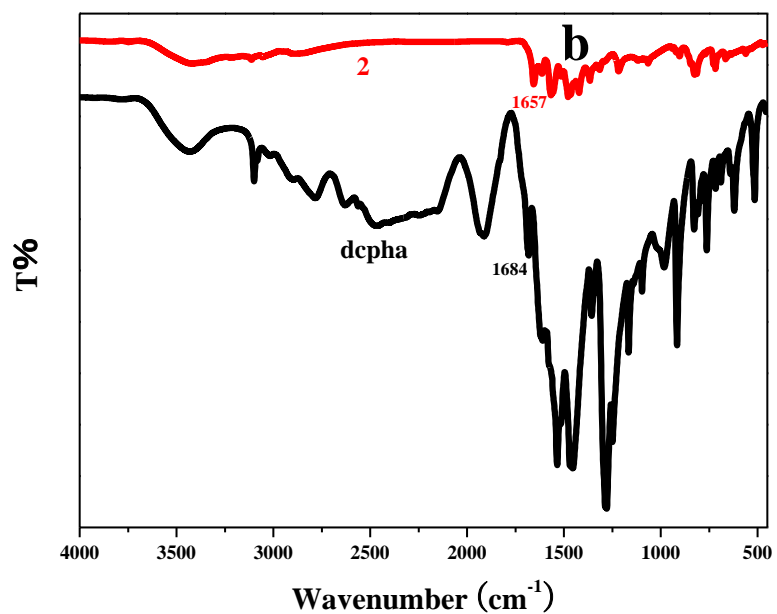

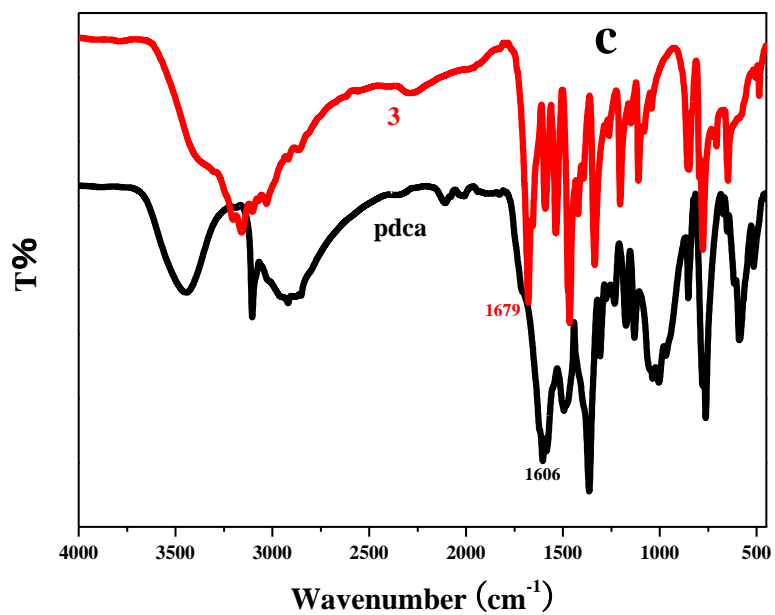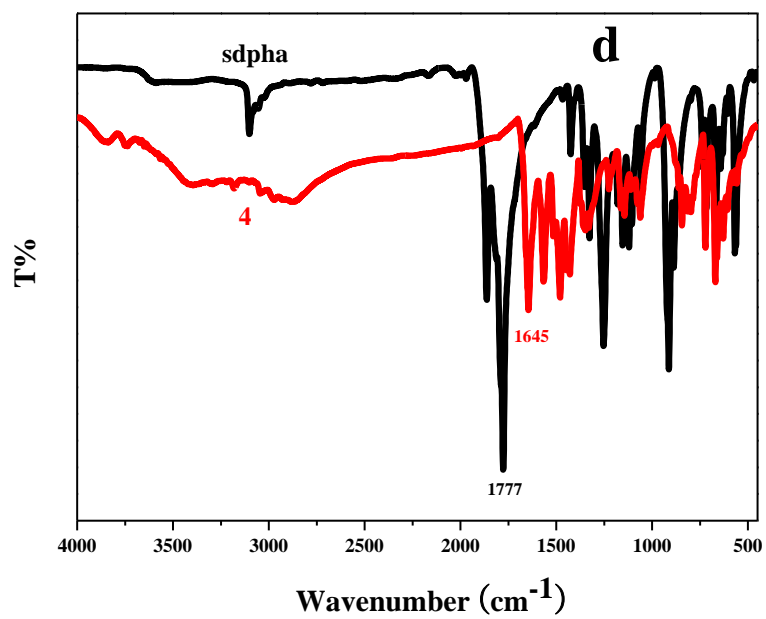

Fig. S1 The IR spectra for the title compounds and the corresponding organic acids.

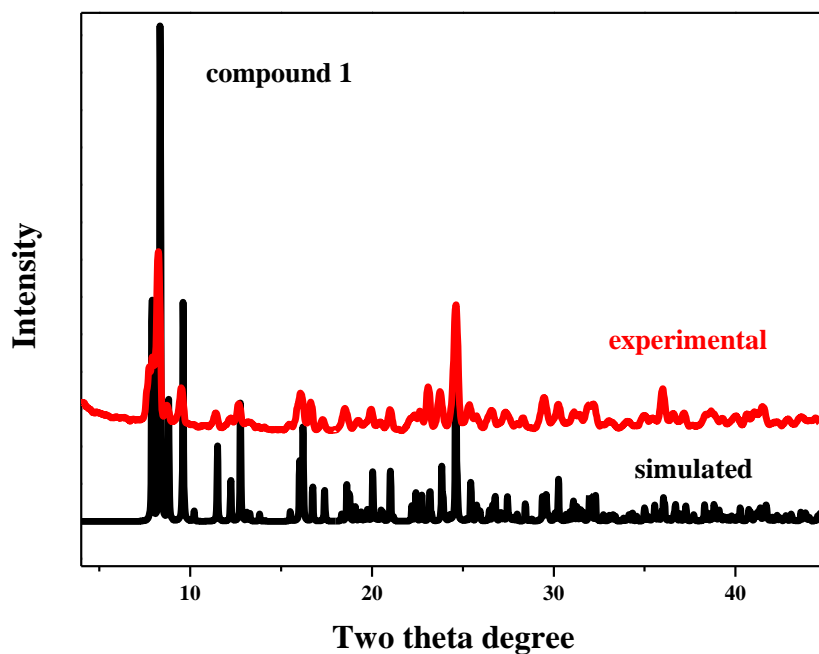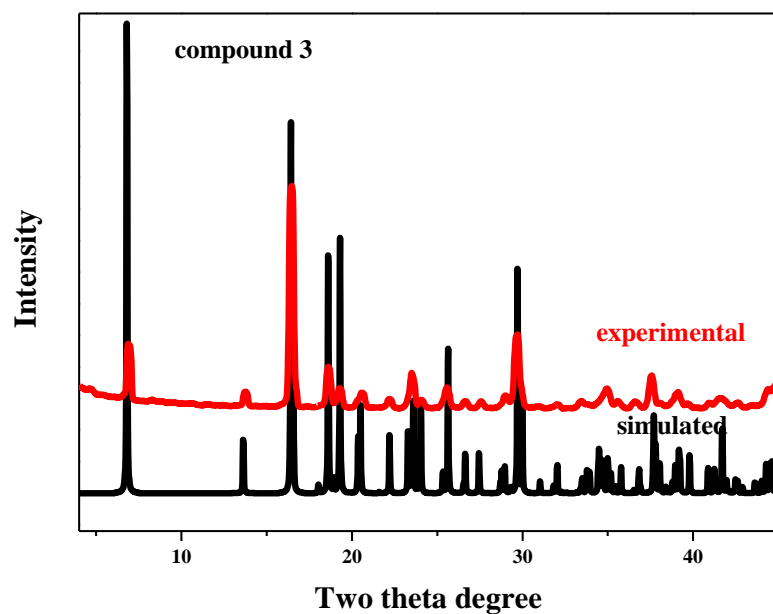

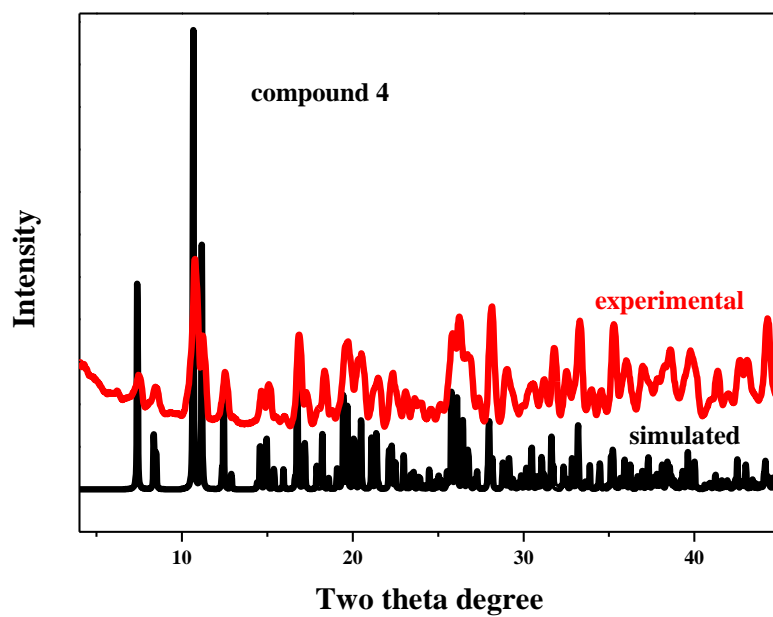

Fig. S2 The experimental (red) and simulated (black) powder XRD patterns for the title compounds.

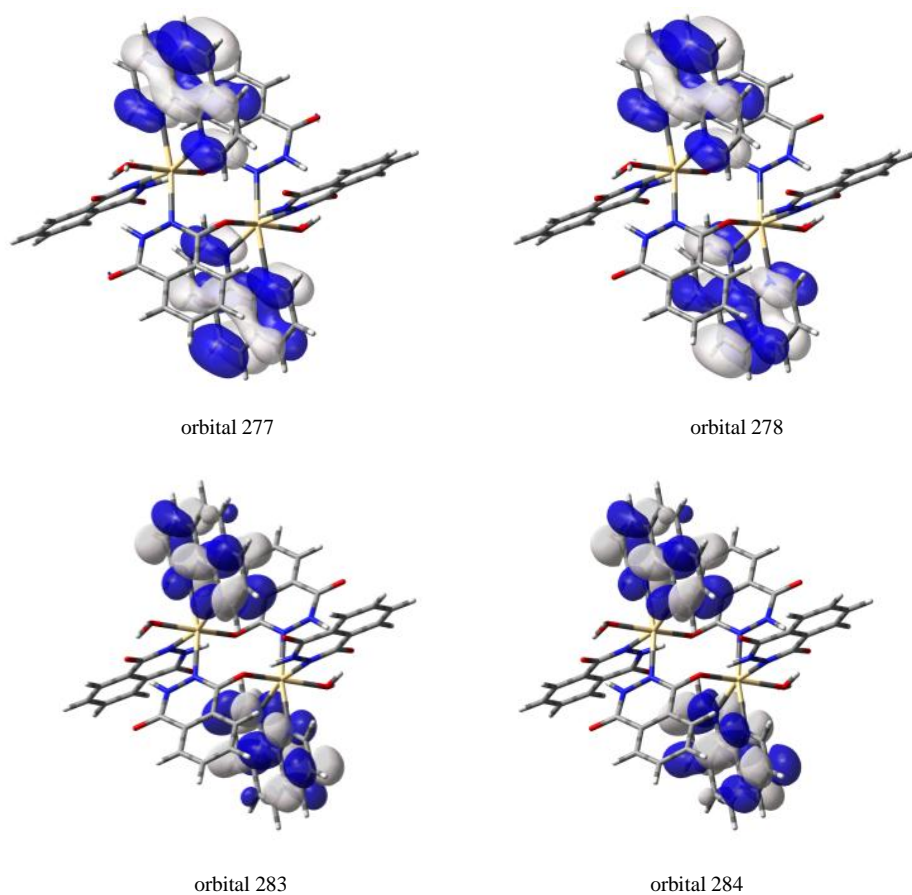

Fig. S3 The surfaces of orbitals 277, 278, 283 and 284 for compound 1.

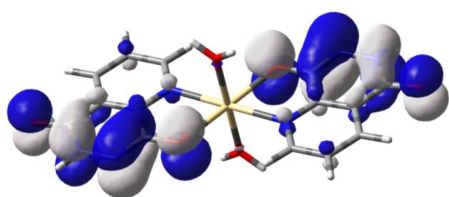

orbital 98

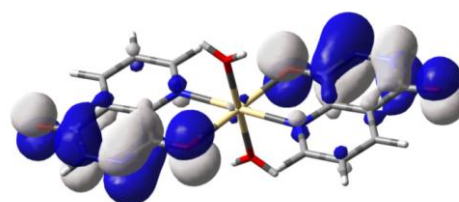

orbital 99

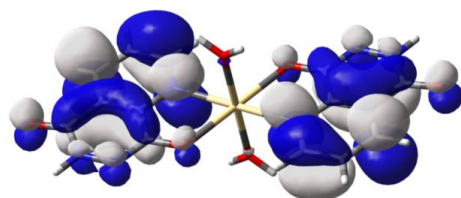

orbital 100

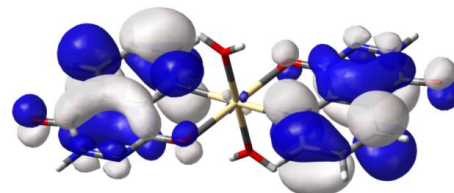

orbital 101

**Fig. S4** The surfaces of orbitals 98, 99, 100 and 101 for compound 3.
